# Supplementary material for: Whole genome analysis of Yersinia ruckeri isolated over 27 years in Australia and New Zealand reveals geographical endemism over multiple lineages and recent evolution under host selection
Source: PubMed Central journal article supplement (PMC5320707; doi:10.1099/mgen.0.000095), 2016-11-30

Supplementary Table 1. Primers used in this study

| Primer      | Sequence 5'-3'        | T <sub>m</sub><br>°C | Amplicon<br>size (kb) | Comments                                                                                                                                                                                    |
|-------------|-----------------------|----------------------|-----------------------|---------------------------------------------------------------------------------------------------------------------------------------------------------------------------------------------|
| 10897F      | cttcggcagtgacataaccg  | 65.5                 | 10.7                  | QMA0440 gap closing PCR using                                                                                                                                                               |
| 21587R      | gtctccacgcatcaccattc  | 65.6                 |                       |                                                                                                                                                                                             |
| 8421F       | agcatcaggaagcagaaggt  | 62.9                 | 11.2                  | LongAmp <i>Taq</i> (New England Biolabs). After initial denaturation at 94°C for 30 sec, cycling for 30 cycles of 94°C 30 sec; 60°C 30 sec; 65°C 10 min, and final extension of 10 min.     |
| 19453R      | caggtgcaatacggatgatgg | 66.3                 |                       |                                                                                                                                                                                             |
| 21568F      | gaatggtgatgcgtggagac  | 65.6                 | 11.1                  |                                                                                                                                                                                             |
| 32676R      | ctagtgtcgaatgtgccacg  | 64.4                 |                       |                                                                                                                                                                                             |
| -3515F      | gctgtcgtcttctgcatcag  | 63.9                 | 7.4                   |                                                                                                                                                                                             |
| 3928R       | gcatgctggtgttatgcgta  | 64.6                 |                       |                                                                                                                                                                                             |
| -5163F      | ccaacggcctttatacaccg  | 66.1                 | 7.8                   |                                                                                                                                                                                             |
| 2743R       | gttcggcgggtacataaac   | 65.1                 |                       |                                                                                                                                                                                             |
| -4697F      | ccaatccgctcaccaatctg  | 67.8                 | 6.9                   |                                                                                                                                                                                             |
| 2342R       | atgtggatggcggttaatggc | 66.7                 |                       |                                                                                                                                                                                             |
| -5484F      | cctgactcatccgggatctc  | 66.0                 | 7.9                   |                                                                                                                                                                                             |
| 2457R       | aaactgaatggcaaggcggt  | 65.6                 |                       |                                                                                                                                                                                             |
| -4354F      | gcaacgccctaccaagaaa   | 66.0                 | 7.2                   |                                                                                                                                                                                             |
| 2994R       | aatccggttgcgactaaccg  | 65.9                 |                       |                                                                                                                                                                                             |
| FliH_F      | agtttgatggcgcagaagat  | 63.7                 | 0.2                   | Flagella operon RT-PCR using MyTaq (Bioline). Initial denaturation 95°C then 30 cycles of 95°C 30 sec; 58°C 30 sec; 72°C 30 sec; final extension 72°C 1 min. FliC primers were multiplexed. |
| FliH_R      | gcttccagcataccttgctc  | 63.8                 |                       |                                                                                                                                                                                             |
| FliI_indF   | aagtgacaggaagtggaaagc | 63.3                 | 0.2                   |                                                                                                                                                                                             |
| FliI_indR   | ataaccggtttctggtgctg  | 63.8                 |                       |                                                                                                                                                                                             |
| FliI_longF  | cgtggtcgtgaagtcaaaga  | 64.0                 | 0.2                   |                                                                                                                                                                                             |
| FliI_longR  | gcgggtcagagaatccataa  | 63.9                 |                       |                                                                                                                                                                                             |
| FliI_shortF | gcgcctatttctgatgcact  | 64.2                 | 0.2                   |                                                                                                                                                                                             |
| FliI_shortR | ataaccggtttctggtgctg  | 63.8                 |                       |                                                                                                                                                                                             |
| FliJ_F      | ttgttactctgcgcgatttg  | 63.8                 | 0.2                   |                                                                                                                                                                                             |
| FliJ_R      | tgctgtttctcttgccaatg  | 64.0                 |                       |                                                                                                                                                                                             |
| FliC1541F   | ctaatgatgcggctgtggtc  | 65.5                 | 0.267                 |                                                                                                                                                                                             |
| FliC1808R   | ttgccattaaccactgcacc  | 65.7                 |                       |                                                                                                                                                                                             |
| FliC4111F   | cgttccactagtgcgtcatg  | 64.4                 | 0.657                 |                                                                                                                                                                                             |
| FliC4768R   | gtcgttattcagacgggcac  | 64.4                 |                       |                                                                                                                                                                                             |

Supplementary Table 2: Draft assembly statistics (Quast v4.2) for SPAdes 3.7.1 assembly of Illumina paired end reads derived from genomic DNA Australian and New Zealand *Y. ruckeri* isolates

| Assembly | # contigs |              |              | # contigs     |               |               | Total length<br>(>= 0 bp) | Total length<br>(>= 1000 bp) | Total length<br>(>= 5000 bp) | Total length<br>(>= 10000 bp) | Total length<br>(>= 25000 bp) | Total length<br>(>= 50000 bp) | # contigs | Largest Total |         | GC (%) | N50    | N75    | L50 | L75 | # N's<br>per 100<br>kbp |
|----------|-----------|--------------|--------------|---------------|---------------|---------------|---------------------------|------------------------------|------------------------------|-------------------------------|-------------------------------|-------------------------------|-----------|---------------|---------|--------|--------|--------|-----|-----|-------------------------|
|          | (>= 0 bp) | (>= 1000 bp) | (>= 5000 bp) | (>= 10000 bp) | (>= 25000 bp) | (>= 50000 bp) |                           |                              |                              |                               |                               |                               |           | contig        | length  |        |        |        |     |     |                         |
| QMA0397  | 91        | 49           | 30           | 27            | 24            | 20            | 3736859                   | 3719549                      | 3673392                      | 3646800                       | 3597206                       | 3446376                       | 63        | 523172        | 3728769 | 47.63  | 195994 | 114296 | 7   | 13  | 0                       |
| QMA0398  | 88        | 52           | 32           | 28            | 25            | 21            | 3737587                   | 3722739                      | 3678852                      | 3646641                       | 3597047                       | 3446283                       | 64        | 523172        | 3730320 | 47.62  | 170601 | 114296 | 7   | 13  | 0                       |
| QMA0399  | 92        | 52           | 33           | 29            | 26            | 22            | 3735979                   | 3718856                      | 3676560                      | 3644349                       | 3596916                       | 3446152                       | 66        | 411926        | 3728187 | 47.62  | 170601 | 111091 | 7   | 14  | 0                       |
| QMA0400  | 89        | 52           | 34           | 29            | 26            | 22            | 3736436                   | 3720407                      | 3678847                      | 3640334                       | 3590740                       | 3439976                       | 65        | 523172        | 3729072 | 47.63  | 170601 | 108701 | 7   | 14  | 0                       |
| QMA0401  | 73        | 47           | 37           | 33            | 28            | 23            | 3762398                   | 3751085                      | 3731151                      | 3705082                       | 3607871                       | 3428883                       | 56        | 359959        | 3757676 | 47.58  | 170486 | 113877 | 8   | 15  | 0                       |
| QMA0402  | 97        | 55           | 34           | 30            | 27            | 23            | 3736833                   | 3720516                      | 3672521                      | 3640310                       | 3592877                       | 3446190                       | 68        | 411926        | 3728723 | 47.62  | 167633 | 108498 | 8   | 15  | 0                       |
| QMA0403  | 93        | 52           | 34           | 30            | 27            | 23            | 3737321                   | 3720191                      | 3675736                      | 3643525                       | 3593931                       | 3447244                       | 66        | 412136        | 3729427 | 47.63  | 167633 | 108463 | 8   | 15  | 0                       |
| QMA0404  | 89        | 51           | 33           | 29            | 26            | 22            | 3736724                   | 3720864                      | 3679091                      | 3646880                       | 3597286                       | 3446522                       | 64        | 412230        | 3729217 | 47.63  | 170601 | 111301 | 7   | 14  | 0                       |
| QMA0405  | 86        | 52           | 33           | 29            | 26            | 22            | 3738811                   | 3723877                      | 3680981                      | 3648770                       | 3598972                       | 3447880                       | 63        | 412165        | 3731722 | 47.62  | 170601 | 111327 | 7   | 14  | 0                       |
| QMA0406  | 91        | 53           | 32           | 28            | 26            | 22            | 3647605                   | 3631826                      | 3587284                      | 3555073                       | 3529743                       | 3378785                       | 65        | 412100        | 3639754 | 47.64  | 167633 | 111793 | 8   | 14  | 0                       |
| QMA0407  | 88        | 51           | 33           | 28            | 26            | 22            | 3740373                   | 3724231                      | 3686465                      | 3648644                       | 3623314                       | 3472356                       | 63        | 523183        | 3732840 | 47.63  | 167633 | 108474 | 7   | 14  | 0                       |
| QMA0408  | 128       | 73           | 38           | 31            | 27            | 23            | 3809302                   | 3787654                      | 3707897                      | 3657111                       | 3597217                       | 3457386                       | 91        | 523127        | 3799376 | 47.63  | 146794 | 94472  | 8   | 15  | 0                       |
| QMA0409  | 50        | 48           | 33           | 28            | 26            | 22            | 3720670                   | 3719881                      | 3682065                      | 3641782                       | 3616452                       | 3465494                       | 48        | 412212        | 3719881 | 47.63  | 170601 | 111301 | 7   | 14  | 0                       |
| QMA0410  | 85        | 54           | 34           | 28            | 24            | 21            | 3758885                   | 3745150                      | 3701930                      | 3656144                       | 3600372                       | 3479407                       | 65        | 523174        | 3752948 | 47.64  | 170601 | 108594 | 7   | 14  | 0                       |
| QMA0411  | 82        | 53           | 32           | 27            | 25            | 21            | 3739307                   | 3726741                      | 3681222                      | 3640939                       | 3615609                       | 3464651                       | 63        | 523154        | 3733481 | 47.63  | 170601 | 108677 | 7   | 14  | 0                       |
| QMA0412  | 79        | 59           | 36           | 30            | 26            | 23            | 3756563                   | 3746078                      | 3699775                      | 3654083                       | 3598404                       | 3477433                       | 67        | 412185        | 3752095 | 47.64  | 167633 | 108594 | 8   | 15  | 0                       |
| QMA0413  | 79        | 52           | 35           | 29            | 27            | 23            | 3740714                   | 3727856                      | 3690269                      | 3640223                       | 3612465                       | 3460997                       | 66        | 309719        | 3737462 | 47.63  | 168506 | 108416 | 8   | 15  | 0                       |
| QMA0414  | 86        | 52           | 33           | 27            | 25            | 22            | 3739716                   | 3725509                      | 3685610                      | 3639025                       | 3613695                       | 3504610                       | 63        | 523109        | 3732920 | 47.62  | 203109 | 108594 | 7   | 14  | 0                       |
| QMA0415  | 106       | 64           | 42           | 36            | 32            | 26            | 3763070                   | 3748101                      | 3699311                      | 3650635                       | 3590790                       | 3372699                       | 77        | 309719        | 3757104 | 47.63  | 138185 | 89270  | 9   | 18  | 0                       |
| QMA0416  | 99        | 60           | 41           | 36            | 32            | 24            | 3772562                   | 3762944                      | 3725993                      | 3688944                       | 3606092                       | 3333869                       | 66        | 312848        | 3767117 | 47.59  | 147047 | 87347  | 9   | 17  | 0                       |
| QMA0417  | 106       | 57           | 38           | 31            | 27            | 23            | 3746724                   | 3732189                      | 3690476                      | 3631735                       | 3562737                       | 3421629                       | 70        | 309719        | 3740912 | 47.62  | 186952 | 108535 | 8   | 15  | 0                       |
| QMA0418  | 134       | 81           | 46           | 37            | 31            | 25            | 3811679                   | 3791689                      | 3710373                      | 3638678                       | 3536984                       | 3339188                       | 102       | 309719        | 3804971 | 47.63  | 143343 | 81990  | 9   | 18  | 0                       |
| QMA0419  | 90        | 57           | 38           | 33            | 29            | 24            | 3743328                   | 3730268                      | 3691952                      | 3651669                       | 3598982                       | 3414964                       | 71        | 309719        | 3739594 | 47.63  | 168506 | 99282  | 9   | 16  | 0                       |
| QMA0420  | 102       | 62           | 43           | 38            | 31            | 24            | 3763214                   | 3748279                      | 3707577                      | 3665550                       | 3565715                       | 3316285                       | 77        | 309719        | 3758355 | 47.64  | 146794 | 94433  | 9   | 17  | 0                       |
| QMA0421  | 86        | 57           | 37           | 32            | 27            | 23            | 3761436                   | 3748800                      | 3705392                      | 3663673                       | 3581834                       | 3437824                       | 70        | 309719        | 3757491 | 47.63  | 186542 | 111091 | 8   | 15  | 0                       |
| QMA0422  | 119       | 66           | 43           | 34            | 32            | 25            | 3744290                   | 3728139                      | 3675108                      | 3601640                       | 3573493                       | 3300047                       | 80        | 309719        | 3737694 | 47.62  | 134906 | 86364  | 10  | 18  | 0                       |
| QMA0423  | 97        | 57           | 37           | 32            | 28            | 25            | 3761900                   | 3746344                      | 3702284                      | 3660436                       | 3592446                       | 3480860                       | 71        | 309719        | 3756030 | 47.64  | 168506 | 99287  | 8   | 16  | 0                       |
| QMA0424  | 87        | 65           | 47           | 39            | 32            | 24            | 3810988                   | 3800686                      | 3760364                      | 3697202                       | 3569831                       | 3283311                       | 77        | 315280        | 3808805 | 47.59  | 144904 | 81901  | 10  | 18  | 0                       |
| QMA0425  | 130       | 77           | 45           | 38            | 30            | 24            | 3812161                   | 3791285                      | 3718870                      | 3661169                       | 3524604                       | 3314524                       | 100       | 309725        | 3806640 | 47.63  | 137958 | 94363  | 9   | 17  | 0                       |
| QMA0426  | 83        | 56           | 33           | 29            | 26            | 23            | 3762041                   | 3749086                      | 3699839                      | 3663472                       | 3619748                       | 3508293                       | 68        | 309719        | 3757695 | 47.64  | 168506 | 111819 | 8   | 15  | 0                       |
| QMA0427  | 99        | 59           | 40           | 35            | 29            | 25            | 3759139                   | 3744144                      | 3701321                      | 3661092                       | 3568224                       | 3424103                       | 73        | 309719        | 3753379 | 47.64  | 143513 | 94440  | 9   | 17  | 0                       |
| QMA0428  | 84        | 55           | 35           | 31            | 27            | 24            | 3762322                   | 3750139                      | 3706184                      | 3673974                       | 3616379                       | 3505341                       | 67        | 309719        | 3758096 | 47.63  | 146794 | 108416 | 9   | 16  | 0                       |
| QMA0429  | 90        | 57           | 36           | 32            | 28            | 25            | 3762511                   | 3748765                      | 3701635                      | 3664829                       | 3596862                       | 3485406                       | 70        | 323342        | 3758224 | 47.64  | 143997 | 108247 | 9   | 16  | 0                       |
| QMA0430  | 92        | 59           | 37           | 33            | 28            | 24            | 3762002                   | 3748910                      | 3699837                      | 3663590                       | 3589378                       | 3453890                       | 72        | 309718        | 3757721 | 47.63  | 168506 | 99288  | 8   | 16  | 0                       |
| QMA0431  | 94        | 53           | 36           | 32            | 26            | 23            | 3758913                   | 3742510                      | 3702942                      | 3666695                       | 3570293                       | 3458823                       | 70        | 309719        | 3753812 | 47.64  | 186542 | 111678 | 8   | 15  | 0                       |
| QMA0432  | 93        | 57           | 37           | 33            | 28            | 24            | 3758422                   | 3745057                      | 3701459                      | 3665227                       | 3593090                       | 3449079                       | 70        | 309719        | 3753686 | 47.64  | 168506 | 108416 | 9   | 16  | 0                       |
| QMA0433  | 88        | 56           | 38           | 34            | 30            | 25            | 3759996                   | 3746331                      | 3701461                      | 3664640                       | 3606374                       | 3423762                       | 69        | 309719        | 3755476 | 47.64  | 146794 | 89270  | 9   | 17  | 0                       |
| QMA0434  | 135       | 66           | 48           | 40            | 31            | 24            | 3765476                   | 3744613                      | 3702324                      | 3639818                       | 3509070                       | 3241438                       | 85        | 311029        | 3757615 | 47.64  | 129165 | 69538  | 9   | 18  | 0                       |
| QMA0435  | 125       | 68           | 40           | 36            | 31            | 25            | 3819581                   | 3795110                      | 3732882                      | 3706050                       | 3624700                       | 3411950                       | 97        | 309763        | 3813436 | 47.64  | 134247 | 93630  | 10  | 18  | 0                       |
| QMA0436  | 76        | 46           | 30           | 27            | 25            | 18            | 3741050                   | 3731187                      | 3703079                      | 3679645                       | 3639981                       | 3399232                       | 54        | 525714        | 3736780 | 47.56  | 252260 | 124942 | 6   | 12  | 0                       |
| QMA0437  | 86        | 46           | 31           | 28            | 26            | 19            | 3741014                   | 3730549                      | 3702647                      | 3679347                       | 3638606                       | 3386745                       | 55        | 525203        | 3736300 | 47.56  | 186581 | 127077 | 7   | 13  | 0                       |
| QMA0438  | 87        | 48           | 33           | 30            | 28            | 20            | 3741241                   | 3727488                      | 3702079                      | 3678779                       | 3639117                       | 3354824                       | 62        | 525372        | 3736750 | 47.56  | 185521 | 119916 | 7   | 14  | 0                       |
| QMA0439  | 93        | 62           | 38           | 33            | 29            | 25            | 3783539                   | 3771599                      | 3714863                      | 3673633                       | 3614037                       | 3476338                       | 73        | 271349        | 3779262 | 47.63  | 140378 | 111586 | 10  | 17  | 0                       |
| AHL1     | 77        | 50           | 37           | 36            | 29            | 26            | 3861398                   | 3851156                      | 3823689                      | 3816306                       | 3694479                       | 3593351                       | 60        | 359170        | 3857563 | 47.6   | 144122 | 93624  | 9   | 16  | 0                       |
| AHL2     | 106       | 56           | 39           | 30            | 28            | 22            | 3690018                   | 3673541                      | 3637974                      | 3655877                       | 3532560                       | 3297157                       | 69        | 389804        | 3681627 | 47.56  | 155481 | 90756  | 8   | 15  | 0                       |
| AHL3     | 79        | 49           | 39           | 38            | 31            | 24            | 3897373                   | 3886187                      | 3863099                      | 3855716                       | 3733785                       | 3501274                       | 60        | 316303        | 3893794 | 47.61  | 186473 | 86869  | 9   | 16  | 0                       |
| AHL4     | 70        | 42           | 32           | 27            | 25            | 20            | 3711371                   | 3703531                      | 3678493                      | 3638434                       | 3604800                       | 3428030                       | 49        | 521428        | 3707941 | 47.58  | 255492 | 94399  | 6   | 12  | 0                       |

Supplementary Table 3. Antisera, reference isolates used in serotyping and macroscopic agglutination assay results

*Yersinia ruckeri* Control Isolates

---

**SFC 37** | ATCC 29473 | Serotype O1a |Originally isolated by Ewing  
*Y. ruckeri* | Rainbow trout (*Oncorhynchus mykiss*) with Red Mouth Disease, USA

**SFC 47** | 88:8181-5A | Serotype O1b |Originally isolated by N. Gudkovs  
*Y. ruckeri* | Atlantic salmon (*Salmo salar*) bacterial septicaemia, Benalla, Victoria, Australia; 1988

**SFC 124** | RD6 | Serotype O1|Clone 2|Biotype 2|OMP-type 1|Originally isolated by R.L. Davies

*Y. ruckeri* | Rainbow trout | AAHL <--- R.L. Davies

**SFC 127** | RD34, BA24 | Serotype O2|Biotype 1|OMP-type 1|Originally isolated by B. Austin

*Y. ruckeri* | Brown trout (*Salmo trutta*)| AAHL <--- R.L. Davies

Antisera (rabbit)

---

**Serum Specificity**

**Serotype O1** | SFC 124 |isolate RD6 from Davies

**R452-1** Serum against whole cell antigen from serotype O1 (Davies)

**R452-6** Serotype O1 specific - Serum against boiled cell antigen from serotype O1 (Davies RD6)

**Serotype O2** | SFC 127 | isolate RD34 from Davies

**R452-2** Serum against whole cell antigen (Davies RD34 serotype O2)

**R452-12** Serotype O2 specific - Serum against phenol extracted LPS antigen, proteinase-K digested (Davies RD34)

Macroscopic agglutination (units are arbitrary)

---

**CONTROL**

| Isolate      | Antiserum   |             |             |              |
|--------------|-------------|-------------|-------------|--------------|
|              | R452-1 (O1) | R452-2 (O2) | R452-6 (O1) | R452-12 (O2) |
| SFC 37 (O1a) | ++          | -           | ++          | -            |
| SFC 47 (O1b) | +           | -           | ++          | -            |
| SFC 124 (O1) | ++          | -           | +++         | -            |
| SFC 127 (O2) | -           | +++         | -           | +++          |

**TEST**

| Isolate   | R452-1 (O1) | R452-2 (O2) | R452-6 (O1) | R452-12 (O2) |
|-----------|-------------|-------------|-------------|--------------|
| QMA0436   | -           | +++         | -           | +++          |
| QMA0437   | -           | +++         | -           | +++          |
| TCFB 3030 | -           | +++         | -           | +++          |
| TCFB 3033 | -           | +++         | -           | +++          |

TCFB: Tasmanian Collection of Fish Bacteria (DPIPWE)

Supplementary Table 4. Gene annotations in the *Y. ruckeri* O-antigen biosynthesis cluster with positions in the reference genome.

| Gene     | Size (aa) | Size (nt) | Function                                                       | Position in QMA0440 genome |         |
|----------|-----------|-----------|----------------------------------------------------------------|----------------------------|---------|
| tetR     | 192       | 576       | transcriptional regulator tetR family                          | 3492534                    | 3493109 |
| tRNA-phe |           | 75        | transfer RNA Phe(gaa)                                          | 3493251                    | 3493326 |
| wbuC     | 134       | 402       | metalloprotein                                                 | 3493560                    | 3493961 |
| wbuB     | 402       | 1206      | putative glycosyl transferase                                  | 3493952                    | 3495157 |
| qnlB1    | 377       | 1131      | UDP-N-acetylglucosamine 2-epimerase                            | 3495157                    | 3496287 |
| rmlC     | 368       | 1104      | NAD-dependent epimerase/dehydratase family protein             | 3496287                    | 3497390 |
| ddhB     | 345       | 1035      | CDP-glucose 4,6-dehydratase/5-epimerase                        | 3497392                    | 3498426 |
| wbuZ     | 265       | 795       | amidation-associated protein                                   | 3498439                    | 3499233 |
| wbuY     | 209       | 627       | glutamine amidotransferase                                     | 3499226                    | 3499852 |
| wbuX     | 378       | 1134      | N-acetyl sugar amidotransferase                                | 3499849                    | 3500982 |
| wbuW     | 406       | 1218      | putative glycosyl transferase                                  | 3500969                    | 3502186 |
| wzz      | 425       | 1275      | chain length determinant                                       | 3502209                    | 3503483 |
| wzx      | 413       | 1239      | O-antigen flippase                                             | 3503568                    | 3504806 |
| idnO     | 255       | 765       | gluconate 5-dehydrogenase                                      | 3504833                    | 3505597 |
| neuA     | 229       | 687       | CMP-N,N'-diacetyllegionaminic acid synthase                    | 3505610                    | 3506296 |
| afr      | 321       | 963       | 1,5-anhydro-D-fructose reductase                               | 3506298                    | 3507260 |
| ddhA     | 352       | 1056      | glucose-1-phosphate cytidyltransferase                         | 3507263                    | 3508318 |
| wbuL     | 212       | 636       | Putative acetyltransferase                                     | 3508339                    | 3508974 |
| neuB     | 358       | 1074      | CMP-N-acetyl-neuraminic acid synthase                          | 3508967                    | 3510040 |
| qnlB2    | 389       | 1167      | UDP-N-acetylglucosamine 2-epimerase                            | 3510047                    | 3511213 |
| degT     | 384       | 1152      | UDP-4-amino-4-deoxy-L-arabinose--oxoglutarate aminotransferase | 3511210                    | 3512361 |
| gne      | 397       | 1191      | UDP-N-acetyl-alpha-D-glucosamine C6 dehydratase                | 3512377                    | 3513567 |
| YedF     | 80        | 240       | SirA-like protein/sulphurtransferase                           | 3514623                    | 3514862 |
| YedE     | 358       | 1074      | putative inner membrane protein sulphur transport              | 3514999                    | 3516072 |
| gltP2    | 439       | 1317      | glutamate/aspartate:proton symporter                           | 3516353                    | 3517669 |
| acs      | 653       | 1959      | acetyl-CoA synthetase                                          | 3518596                    | 3520554 |

Supplementary Figure 1 Maximum likelihood phylogeny and regions of recombination identified amongst *Y. ruckeri* isolates with Gubbins

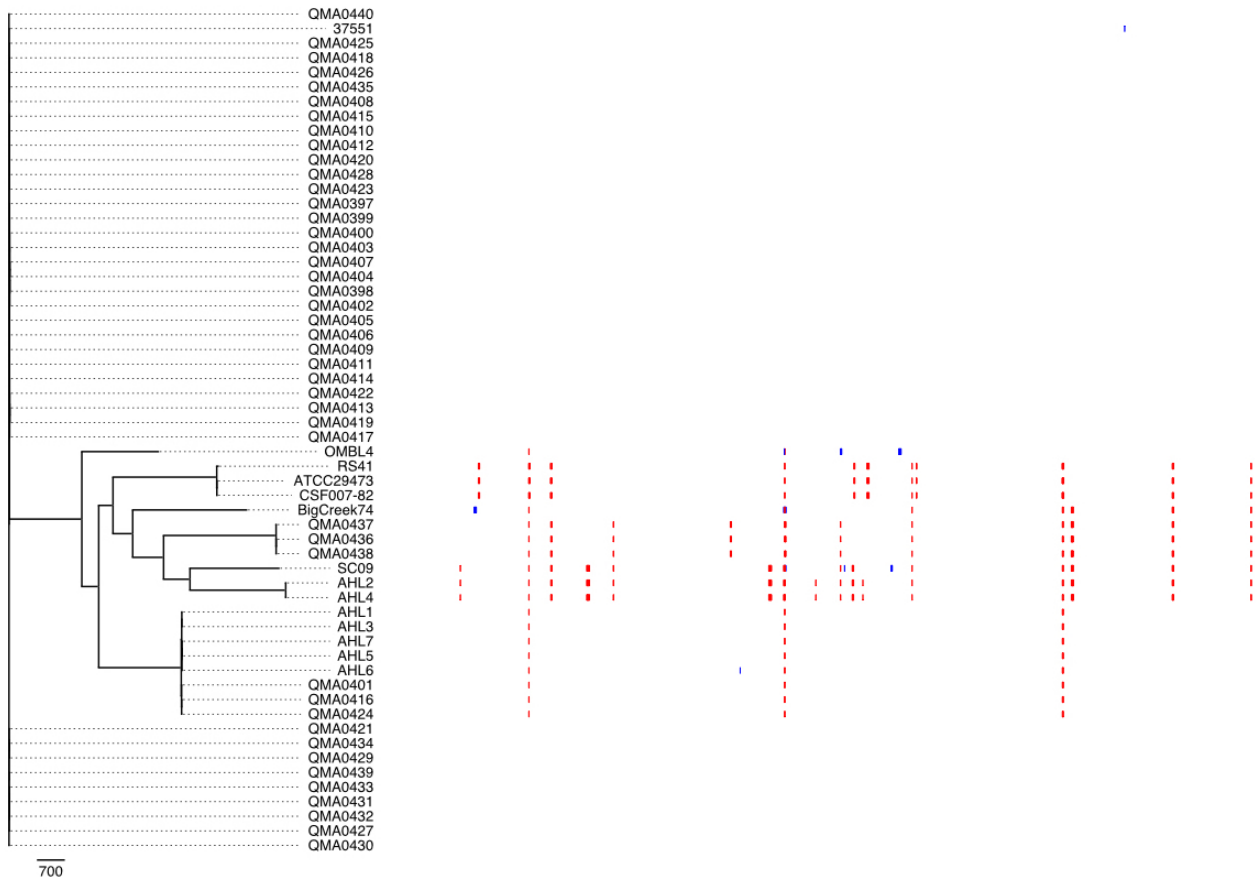

Supplementary Figure 2. Root to tip regression of substitutions against time (date of isolation) using TempEst. Regression was performed on trees constructed in RAxML by maximum likelihood analysis of alignments of core-genome SNPs after recombination filtering using Felsenstein's correction for ascertainment bias (See text). Where date of isolation was unknown, data were excluded from the analysis. Where SNP profiles for isolates were identical, one representative was retained in the analysis. A) Set of Australasian and exotic isolates (n=42): Substitution rate =  $1.10 \times 10^{-6}$ , correlation (Pearson) 0.5224,  $R^2 = 0.2729$ , residual mean =  $4.56 \times 10^{-10}$ . B) Atlantic salmon serotype O1b isolates (n=38) from Tasmania: Substitution rate =  $4.87 \times 10^{-7}$ , correlation = 0.827,  $R^2 = 0.6846$ , residual mean =  $6.25 \times 10^{-12}$ .

**A**

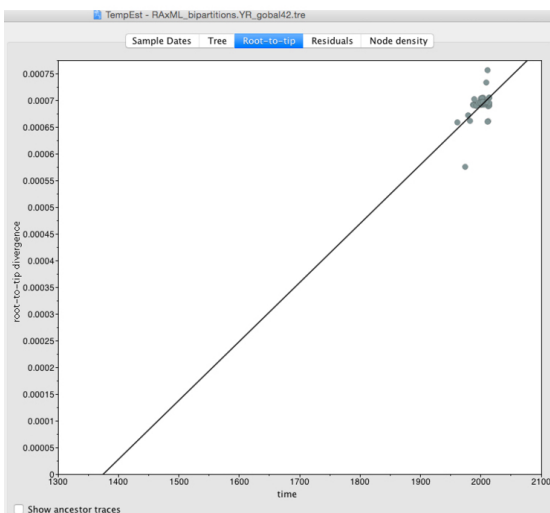

**B**

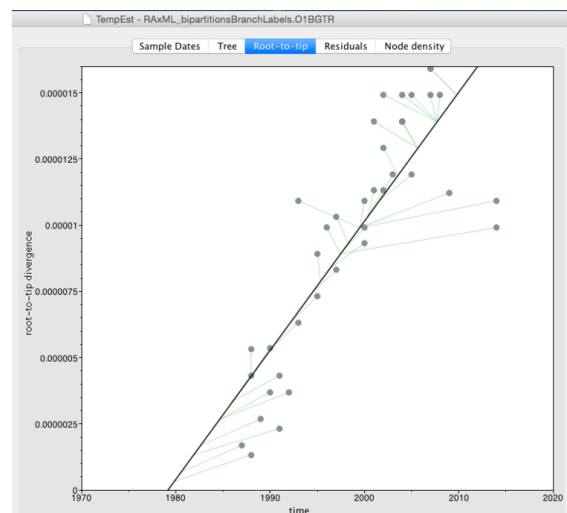

Supplement: mgen-02-95-s001.pdf [file mgen-02-95-s001.pdf]
